# Supplementary material for: Standard and competing risk analysis of the effect of albuminuria on cardiovascular and cancer mortality in patients with type 2 diabetes mellitus
Source: PubMed Central journal article supplement (PMC6460530; doi:10.1186/s41512-018-0035-4), 2018-07-23

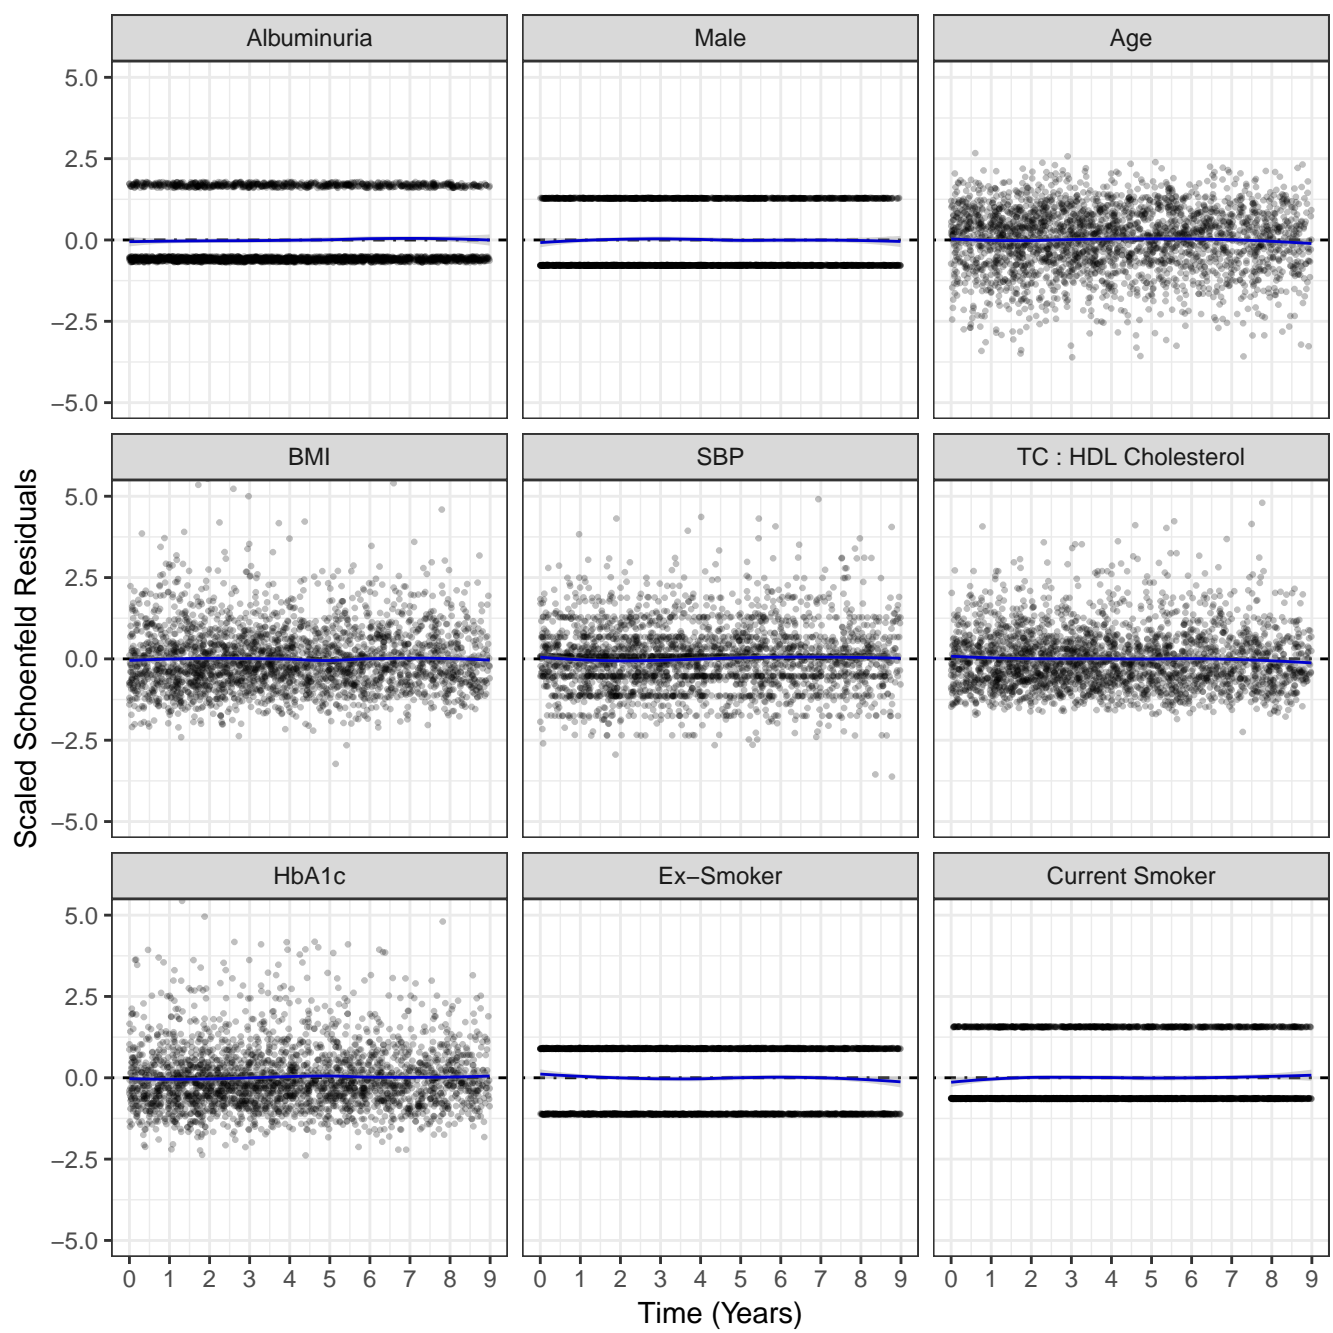

Supplement: 41512_2018_35_MOESM4_ESM.pdf [file 41512_2018_35_MOESM4_ESM.pdf]
